# Supplementary material for: Large-scale replication study identified multiple independent SNPs in RET synergistically associated with Hirschsprung disease in Southern Chinese population
Source: PubMed Central journal article supplement (PMC5636671; doi:10.18632/aging.101294), 2017-09-20
Supplement: aging-09-1996-s001.pdf [file aging-09-1996-s001.pdf]

## SUPPLEMENTAL MATERIAL

**Supplementary Table 1. Functional prediction of the sixteen recruited SNPs in RET by Regulome DB annotation.**

| #chromosome | coordinate | rsid       | score |
|-------------|------------|------------|-------|
| chr10       | 43612608   | rs2742234  | 1f    |
| chr10       | 43447846   | rs2506030  | 2b    |
| chr10       | 43582055   | rs2435357  | 2b    |
| chr10       | 43572510   | rs10900297 | 4     |
| chr10       | 43574935   | rs2506011  | 4     |
| chr10       | 43606686   | rs1800860  | 4     |
| chr10       | 43583149   | rs2435356  | 5     |
| chr10       | 43594544   | rs2505532  | 5     |
| chr10       | 43595967   | rs1800858  | 5     |
| chr10       | 43613842   | rs1800861  | 5     |
| chr10       | 43620334   | rs17158558 | 5     |
| chr10       | 43620550   | rs2742236  | 5     |
| chr10       | 43652759   | rs7893332  | 5     |
| chr10       | 43702142   | rs1254958  | 5     |
| chr10       | 43769890   | rs2505526  | 5     |
| chr10       | 43595780   | rs2565206  | 7     |

| Score | Supporting data                                                             |
|-------|-----------------------------------------------------------------------------|
| 1a    | eQTL + TF binding + matched TF motif + matched DNase Footprint + DNase peak |
| 1b    | eQTL + TF binding + any motif + DNase Footprint + DNase peak                |
| 1c    | eQTL + TF binding + matched TF motif + DNase peak                           |
| 1d    | eQTL + TF binding + any motif + DNase peak                                  |
| 1e    | eQTL + TF binding + matched TF motif                                        |
| 1f    | eQTL + TF binding / DNase peak                                              |
| 2a    | TF binding + matched TF motif + matched DNase Footprint + DNase peak        |
| 2b    | TF binding + any motif + DNase Footprint + DNase peak                       |
| 2c    | TF binding + matched TF motif + DNase peak                                  |
| 3a    | TF binding + any motif + DNase peak                                         |
| 3b    | TF binding + matched TF motif                                               |
| 4     | TF binding + DNase peak                                                     |
| 5     | TF binding or DNase peak                                                    |
| 6     | other                                                                       |

Web sources used in this study

RegulomeDB:

<http://regulome.stanford.edu/>

**Supplementary Table 2. The subclinical information collected for the subjects in this study.**

| HCSR subphenotype          | Cases (n=1470) | %      | Controls (n=1473) | %      |
|----------------------------|----------------|--------|-------------------|--------|
| Subjects                   |                |        |                   |        |
| Age range ( Months )       | 8.37±20.50     |        | 18.61±19.75       |        |
| ≤2                         | 725            | 49.32% | 458               | 31.09% |
| >2                         | 745            | 50.68% | 1015              | 68.91% |
| Gender                     |                |        |                   |        |
| Females                    | 240            | 16.33% | 967               | 65.65% |
| Males                      | 1230           | 83.67% | 506               | 34.35% |
| Clinical manifestation     |                |        |                   |        |
| SHCSR                      | 1033           | 70.27% |                   |        |
| LHCSR                      | 294            | 20.00% |                   |        |
| TCA                        | 82             | 5.58%  |                   |        |
| Total intestine            | 3              | 0.20%  |                   |        |
| Enteritis_before_operation | 261            | 17.76% |                   |        |
| Enteritis_after_operation  | 249            | 16.94% |                   |        |

**Supplementary Table 3. The case-only association comparing the gender heterogeneity between females and males.**

| CHR | SNP       | BP       | A1/A2 | Freq_female | Freq_male | P    | OR   | 0.95 CI       |
|-----|-----------|----------|-------|-------------|-----------|------|------|---------------|
| 10  | rs2506030 | 42952399 | G/A   | 0.80        | 0.80      | 0.97 | 1.01 | ( 0.79~1.28 ) |
| 10  | rs2435357 | 43086608 | T/C   | 0.71        | 0.71      | 0.90 | 0.99 | ( 0.79~1.23 ) |
| 10  | rs2505532 | 43099097 | C/T   | 0.76        | 0.75      | 0.47 | 1.09 | ( 0.86~1.38 ) |
| 10  | rs1800860 | 43111239 | G/A   | 0.84        | 0.84      | 0.96 | 0.99 | ( 0.76~1.30 ) |
| 10  | rs2742234 | 43117161 | C/T   | 0.67        | 0.69      | 0.28 | 0.89 | ( 0.72~1.10 ) |
| 10  | rs2742236 | 43125103 | G/A   | 0.80        | 0.81      | 0.38 | 0.90 | ( 0.70~1.15 ) |

freq : frequency

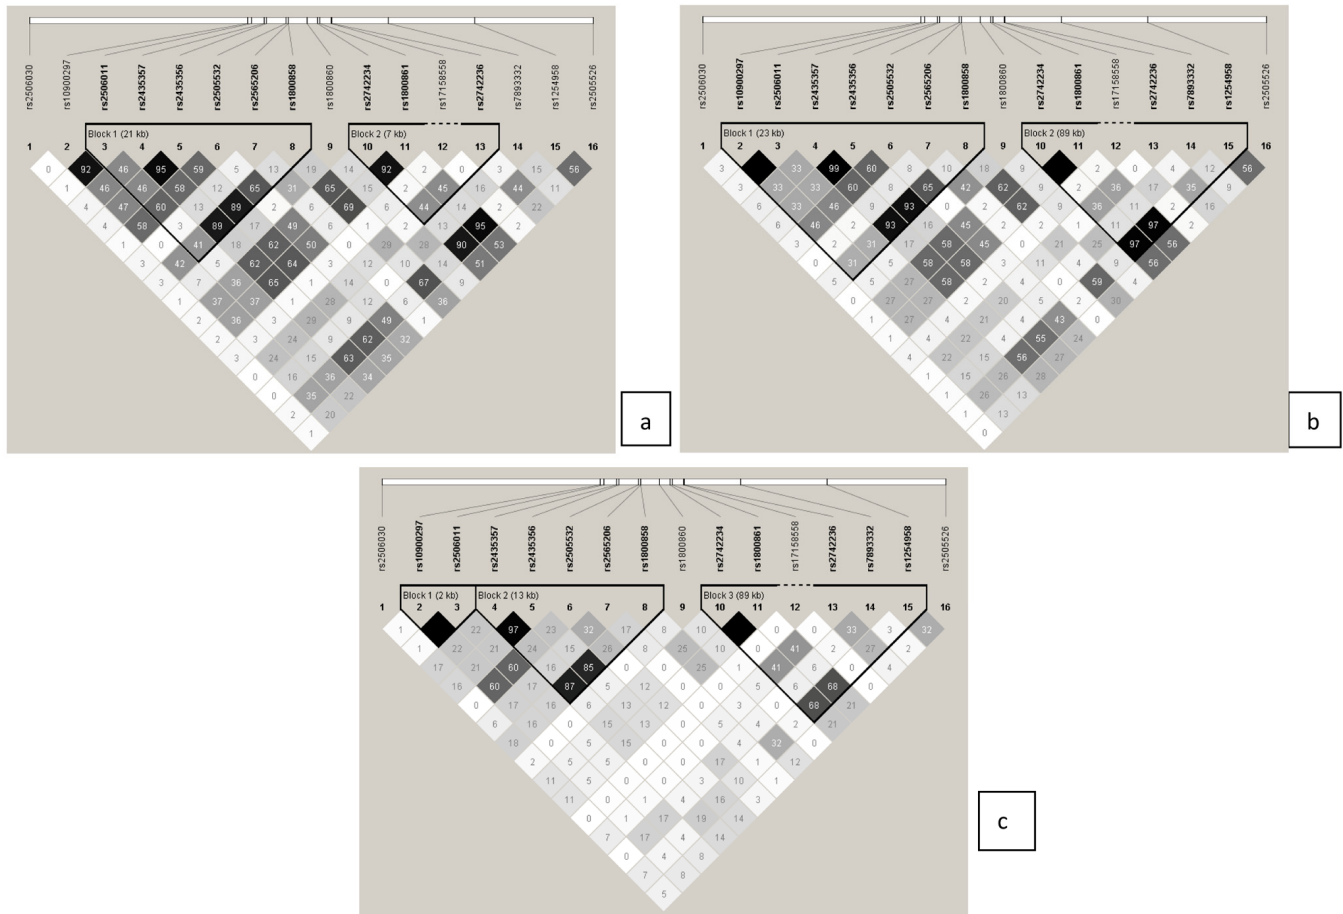

**Supplementary Figure 1.** The LD ( $r^2$ ) patterns of sixteen recruited SNPs in RET across South Chinese population in this study (a), Eastern Asian populations (b) and CEU populations (c) from 1000G data. The LD pattern looks less comprehensive in CEU comparing with Chinese, shows the genetic heterogeneity between the populations and may partially explain the etiology difference

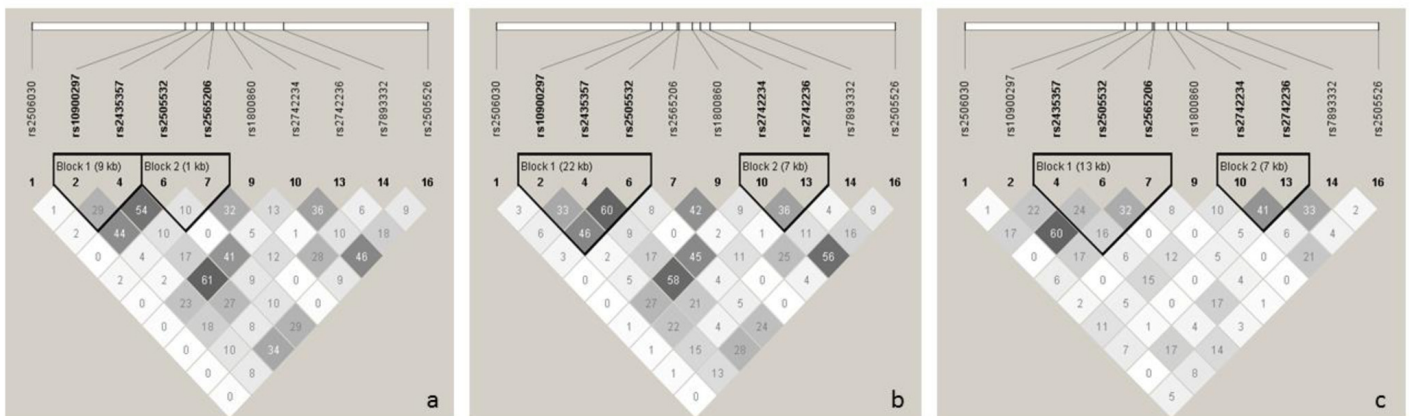

**Supplementary Figure 2.** The LD patterns among ten SNPs showed significant disease association in different populations. Shown are  $r^2$  values for individuals in South Chinese populations replicated in this study (a), East Asian populations (CHB, CHX and JPT) (b), Utah residents with ancestry from northern and western Europe (CEU) (c); The LD patterns between (a) and (b) are similar, which are slightly different with the LD pattern of (c), reflecting the potential population difference.

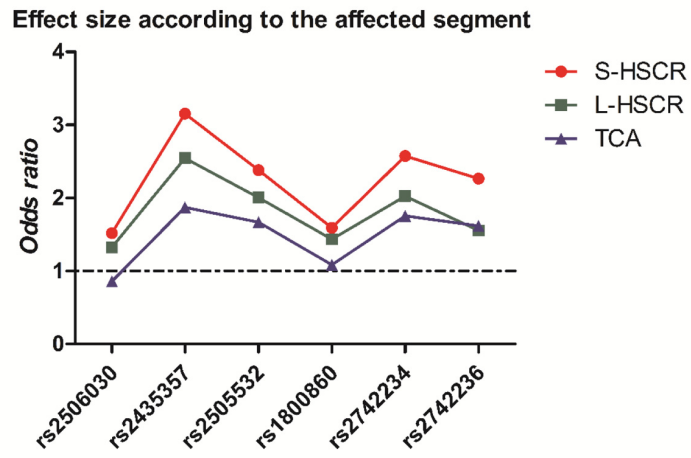

**Supplementary Figure 3.** The effect size (OR) comparison among three subclinical groups including short-length(S-HSCR), long-length (L-HSCR) and TCA.
